# Supplementary material
Source: publisher site journal article supplement (https://www.dovepress.com/article/378321)
Supplement: Supplementary file 1 [file get_supplementary_file.php]

## Supplementary Figures

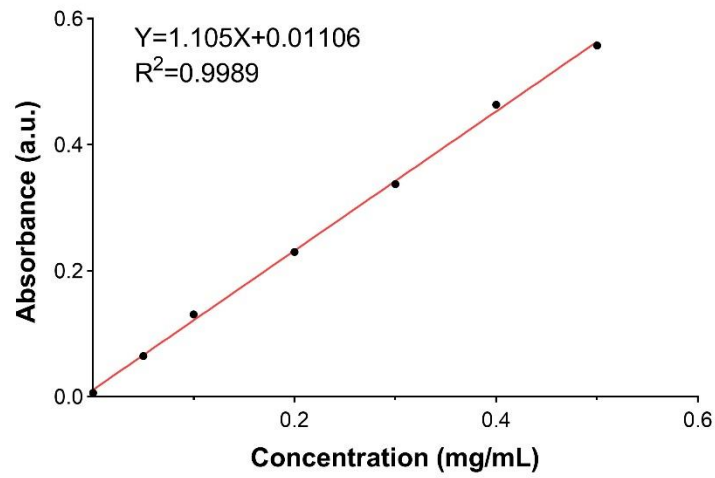

**Supplementary Figure S1** CAT spectrum at the relative absorbance intensity wavelength of 562 nm in UV absorption spectrum.

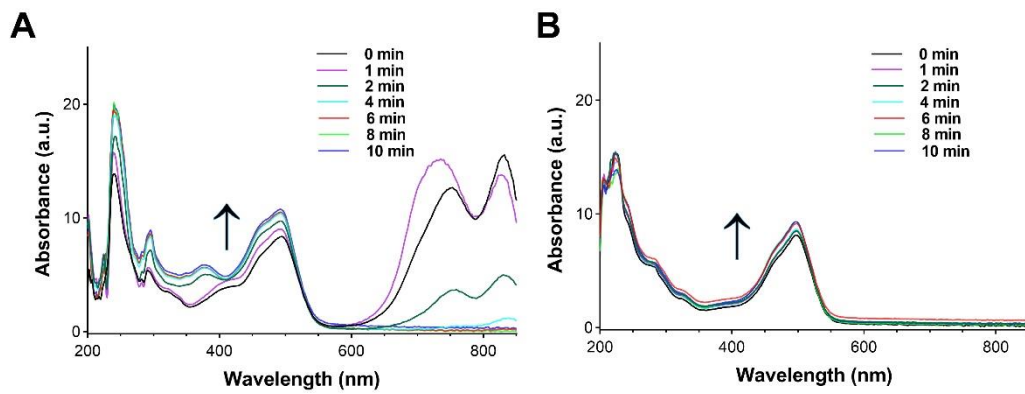

**Supplementary Figure S2** (A) NIR laser-triggered UV absorption spectra of calcein released from c-TINP at different times. (B) UV absorption spectra of NIR laser-triggered calcein released from c-TNP at different times.

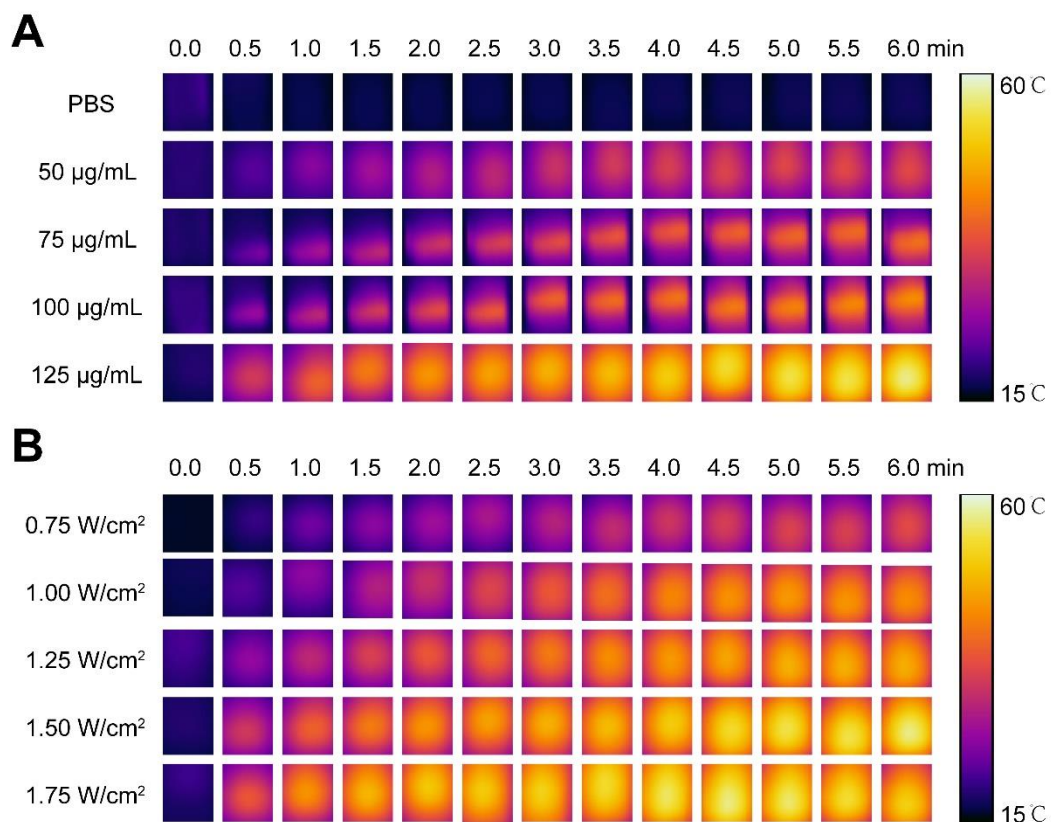

**Supplementary Figure S3** (A) Representative photothermal images in vitro of PBS and suspensions containing different IR820 concentrations of TSL-IR820-CAT under light irradiation (808 nm, 1.5  $\text{W/cm}^2$ ). (B) In vitro representative photothermal images of suspensions of TSL-IR820-CAT under 808 nm laser at different power densities with a fixed IR820 concentration (125  $\mu\text{g/mL}$ ).

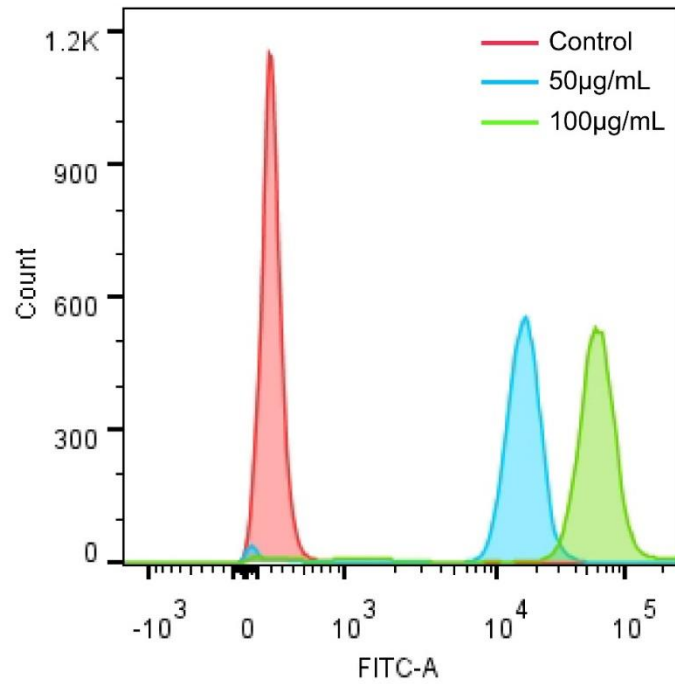

**Supplementary Figure S4** Flow cytometry to analyze the intracellular uptake of f-TICNP after incubation with different concentrations of f-TICNP.

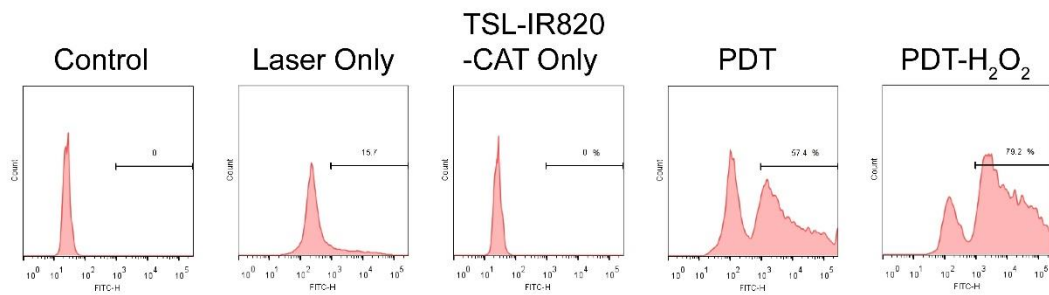

**Supplementary Figure S5** Flow cytometry analysis of ROS generated by different treatments.

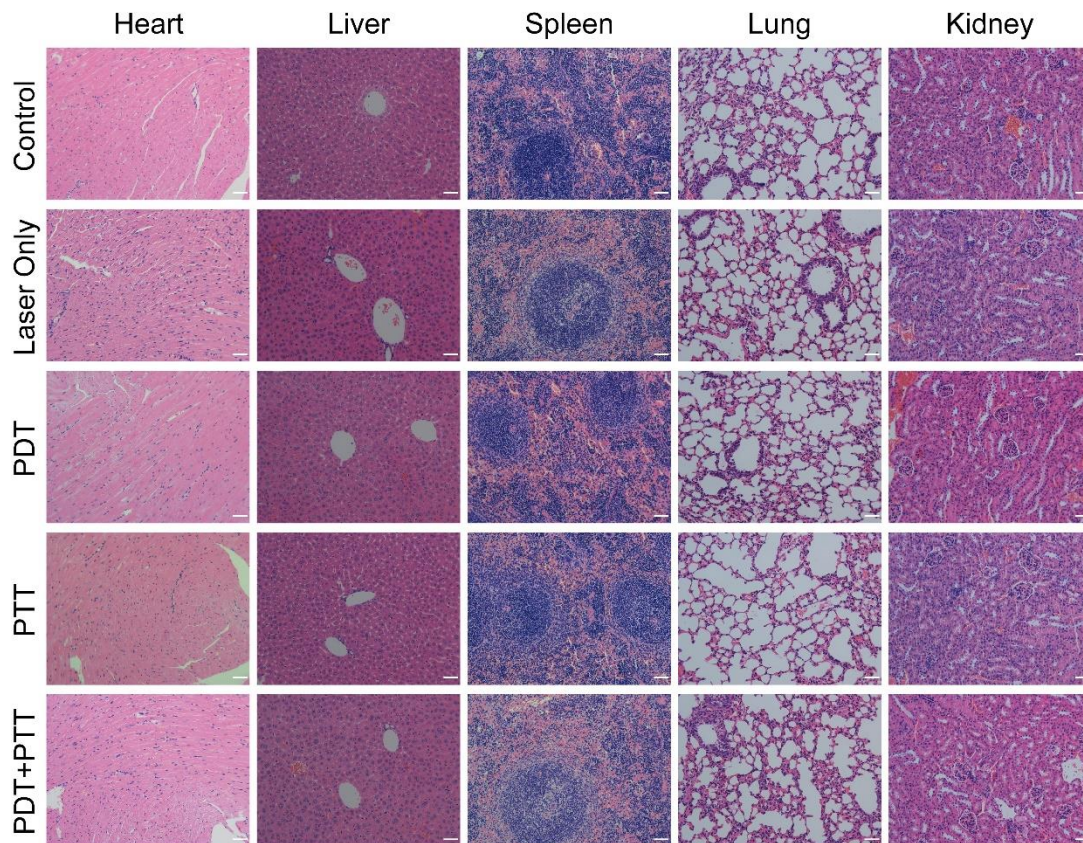

**Supplementary Figure S6** H&E staining of the main organs (heart, liver, spleen, lung, and kidney) of five groups of tumor-bearing mice after different treatments. Scale bar, 50 µm.

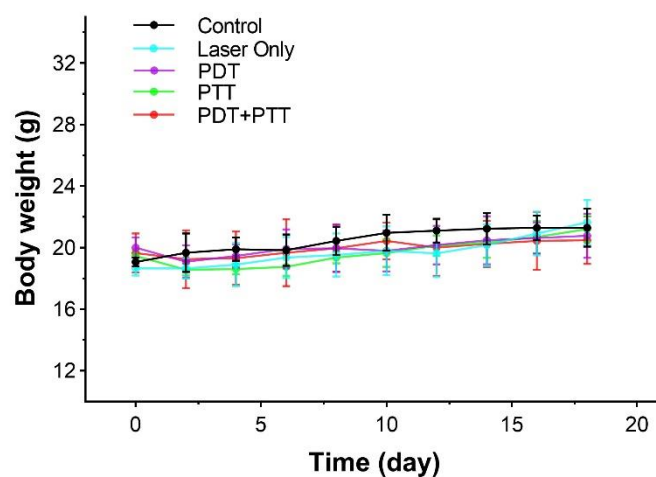

**Supplementary Figure S7** A431 tumor-bearing mice body weight changes during treatment.
